# Supplementary material
Source: PubMed Central journal article supplement (PMC4214527)
Supplement: ASN.2013091003_ASN2013091003SupplementaryData.pdf [file ASN.2013091003_ASN2013091003SupplementaryData.pdf]

## Supplementary material

# Fetal and infant growth patterns and kidney function at school-age

Hanneke Bakker MD <sup>1,2,3</sup>; Romy Gaillard MSc, <sup>1,2,3</sup>; Oscar H. Franco, MD, PhD<sup>2</sup>; Albert Hofman MD, PhD<sup>2</sup>; Albert J. van der Heijden MD, PhD<sup>3</sup>; Eric A. P. Steegers MD, PhD<sup>4</sup>; H. Rob Taal MD, PhD<sup>3</sup>; Vincent W.V. Jaddoe MD, PhD\* <sup>1,2,3</sup>

1. The Generation R Study Group, Erasmus University Medical Center, Rotterdam, The Netherlands
2. Department of Epidemiology, Erasmus University Medical Center, Rotterdam, The Netherlands
3. Department of Pediatrics, Erasmus University Medical Center, Rotterdam, The Netherlands
4. Department of Obstetrics and Gynaecology, Erasmus University Medical Center, Rotterdam

### Contents

#### Imputation procedure

Table S1. Maternal and child characteristics for non-imputed and imputed data

Table S2. Subject characteristics of subjects with and without childhood blood samples

Table S3. Associations of birth outcomes with kidney volume and function at the age of 6 years: basic model

Table S4. Associations of birth outcomes with kidney outcomes at the age of 6 years with non-imputed data

Table S5. Associations of birth outcomes with kidney outcomes at the age of 6 years adjusted for kidney volume

Table S6. Associations of fetal and length and weight with kidney volume and function at the age of 6 years: basic model

Table S7. Associations of fetal and length and weight with kidney volume and function at the age of 6 years: confounder model

Figure S1. Association of small and large size size for gestational age with kidney volume and function at the age of 6 years

Figure S2. Associations of fetal and childhood length with kidney outcomes at the age of 6 years

Figure S3. Associations of fetal and childhood weight and length with estimated glomerular filtration rate at the age of 6 years adjusted for kidney volume

## **Imputation procedure**

To reduce the possibility of potential bias associated with missing data and to maintain statistical power, missing values were imputed using the multiple imputations procedure.<sup>1</sup> For the multiple imputations, we used Fully Conditional Specification, an iterative of the Markov Chain Monte Carlo approach. For each variable, the fully conditional specification method fits a model using all other available variables in the model as predictors, and then imputes missing values for the specific variable being fit. In the imputation model for the analyses focused on the associations of early growth outcomes with kidney outcomes in childhood, we included all covariates except childhood body surface area plus maternal weight gain during pregnancy and height and weight of the child aged 6. Furthermore, we added the determinants and outcomes studied in the imputation model as prediction variables only. Determinants and outcomes were not imputed themselves. Five imputed datasets were created and analyzed together. For the conditional analyses only, we additionally imputed fetal and childhood growth characteristics using a similar imputation model.

1. Sterne JA, White IR, Carlin JB, et al. Multiple imputation for missing data in epidemiological and clinical research: potential and pitfalls. *BMJ (Clinical research ed)*. 2009;338:b2393.

**Table S1. Maternal and child characteristics for non-imputed and imputed data**

|                                                  | <b>Non-imputed</b>  | <b>Imputed</b> |
|--------------------------------------------------|---------------------|----------------|
| <b>Maternal characteristics</b>                  |                     |                |
| Age, yr                                          | 31.1 (21.2 to 38.8) | -              |
| Height, cm                                       | 167.5 (7.4)         | 167.6 (7.4)    |
| Pre-pregnancy body mass index, kg/m <sup>2</sup> | 23.6 (4.2)          | 23.6 (4.3)     |
| Parity ≥1, %                                     | 43.6 (2730)         | 44.0 (2852)    |
| Ethnicity, %                                     |                     |                |
| European                                         | 61.5 (3882)         | 61.2 (3964)    |
| Non-European                                     | 38.5 (2428)         | 38.8 (2518)    |
| Educational level, %                             |                     |                |
| No higher education                              | 53.3 (3142)         | 54.5 (3534)    |
| Higher education                                 | 46.7 (2750)         | 45.5 (2948)    |
| Smoking, %                                       |                     |                |
| No                                               | 74.7 (4199)         | 74.9 (4855)    |
| Yes                                              | 25.3 (1423)         | 25.1 (1627)    |
| Folic acid supplement use, %                     |                     |                |
| No                                               | 25.7 (1122)         | 23.4 (1601)    |
| Preconceptional                                  | 43.2 (1930)         | 38.8 (2515)    |
| Postconceptional                                 | 31.6 (1411)         | 37.8 (2189)    |
| <b>Infant characteristics</b>                    |                     |                |
| Gestational age, weeks                           | 40.1 (37.0 to 42.1) | -              |
| Birth weight, g                                  | 3425 (558)          | -              |
| Breastfeeding, %                                 |                     |                |
| No                                               | 7.6 (382)           | 7.9 (511)      |
| Yes                                              | 92.4 (4662)         | 92.1 (5971)    |
| <b>Child characteristics</b>                     |                     |                |
| Age, years                                       | 6.0 (5.7 to 7.5)    | -              |
| Height, cm                                       | 119.5 (6.1)         | -              |
| Weight, kg                                       | 23.3 (4.3)          | -              |
| Body mass index, kg/m <sup>2</sup>               | 16.2 (1.9)          | -              |
| Kidney volume combined, cm <sup>3</sup>          | 120.3 (23.5)        | -              |
| eGFR, ml/min per 1.73m <sup>2</sup>              | 118.8 (16.4)        | -              |

|                    |           |   |
|--------------------|-----------|---|
| Microalbuminuria % | 6.8 (217) | - |
|--------------------|-----------|---|

---

Values are means (standard deviation), median (90% range) or percentage (number).  
eGFR, estimated glomerular filtration rate

**Table S2. Subject characteristics of subjects with and without childhood blood samples**

|                                                     | <b>With blood sample<br/>(N = 4336)</b> | <b>Without blood<br/>sample<br/>(N = 2146)</b> | <b>P value</b> |
|-----------------------------------------------------|-----------------------------------------|------------------------------------------------|----------------|
| <b>Maternal characteristics</b>                     |                                         |                                                |                |
| Age, yr                                             | 31.2 (21.4 to 38.7)                     | 30.8 (20.9 to 38.4)                            | <0.001         |
| Height, cm                                          | 167.7 (7.5)                             | 167.1 (7.3)                                    | 0.002          |
| Pre-pregnancy body mass index,<br>kg/m <sup>2</sup> | 23.6 (4.2)                              | 23.6 (4.4)                                     | 0.969          |
| Parity ≥1, %                                        | 44.9 (1875)                             | 41.0 (855)                                     | 0.003          |
| Ethnicity, %                                        |                                         |                                                | 0.409          |
| European                                            | 60.2 (2610)                             | 60.8 (1272)                                    |                |
| Non -European                                       | 38.1 (1608)                             | 39.2 (820)                                     |                |
| Educational level, %                                |                                         |                                                | 0.007          |
| No higher education                                 | 52.1 (2053)                             | 55.8 (1089)                                    |                |
| Higher education                                    | 47.9 (1888)                             | 44.2 (862)                                     |                |
| Smoking, %                                          |                                         |                                                | 0.763          |
| No                                                  | 75.0 (2820)                             | 74.0 (1379)                                    |                |
| Yes                                                 | 24.9 (336)                              | 8.7 (162)                                      |                |
| Folic acid supplement use, %                        |                                         |                                                | 0.432          |
| No                                                  | 24.8 (739)                              | 25.8 (383)                                     |                |
| Preconceptional                                     | 31.2 (930)                              | 32.4 (481)                                     |                |
| Postconceptional                                    | 44.0 (1309)                             | 41.8 (621)                                     |                |
| <b>Infant characteristics</b>                       |                                         |                                                |                |
| Gestational age, weeks                              | 40.1 (36.9 to 42.0)                     | 40.1 (36.9 to 42.0)                            | 0.685          |
| Birth weight, g                                     | 3439 (548)                              | 3397 (566)                                     | 0.004          |
| Breastfeeding, %                                    |                                         |                                                | 0.705          |
| No                                                  | 7.5 (255)                               | 7.8 (127)                                      |                |
| Yes                                                 | 92.5 (3156)                             | 92.2 (1506)                                    |                |
| <b>Child characteristics</b>                        |                                         |                                                |                |
| Age, years                                          | 6.0 (5.7 to 7.5)                        | 6.0 (5.7 to 7.1)                               | <0.001         |
| Height, cm                                          | 119.7 (6.0)                             | 118.9 (6.0)                                    | <0.001         |
| Weight, kg                                          | 23.4 (4.3)                              | 23.1 (4.3)                                     | 0.009          |
| Body mass index, kg/m <sup>2</sup>                  | 16.2 (1.9)                              | 16.2 (2.0)                                     | 0.838          |

|                                         |              |              |       |
|-----------------------------------------|--------------|--------------|-------|
| Kidney volume combined, cm <sup>3</sup> | 120.8 (23.6) | 119.3 (23.1) | 0.021 |
| eGFR, ml/min per 1.73m <sup>2</sup>     | 118.8 (16.4) | -            | -     |
| Microalbuminuria %                      | 7.7 (324)    | 7.3 (149)    | 0.585 |

---

Values are means (standard deviation), median (90% range) or percentage (number)

T-tests were used for continuous variables, chi-square tests for categorical variables.

eGFR, estimated glomerular filtration rate

**Table S3. Associations of birth outcomes with kidney volume and function at the age of 6 years: basic model**

| <b>Birth characteristics</b>     | <b>Difference (95% CI)<br/>in combined kidney<br/>volume<br/>(cm<sup>3</sup>)</b> | <b>Difference (95% CI)<br/>in eGFR<br/>(ml/min per 1.73m<sup>2</sup>)</b> | <b>Risk (Odds Ratio<br/>(95%CI)) of micro<br/>albuminuria</b> |
|----------------------------------|-----------------------------------------------------------------------------------|---------------------------------------------------------------------------|---------------------------------------------------------------|
| <b>Gestational age</b> N = 6,482 |                                                                                   |                                                                           |                                                               |
| < 34 weeks                       | -6.36**                                                                           | -2.12                                                                     | 0.81                                                          |
| N = 98                           | (-11.15 to -1.56)                                                                 | (-6.24 to 1.99)                                                           | (0.35 to 1.88)                                                |
| 34.0 – 35.9 weeks                | -9.08**                                                                           | 2.85                                                                      | 0.64                                                          |
| N = 102                          | (-13.68 to -4.48)                                                                 | (-1.06 to 6.76)                                                           | (0.26 to 1.60)                                                |
| 36.0 – 37.9 weeks                | -3.58**                                                                           | 0.92                                                                      | 0.93                                                          |
| N = 514                          | (-5.83 to -1.32)                                                                  | (-1.01 to 2.85)                                                           | (0.64 to 1.36)                                                |
| 38.0 - 39.9 weeks                | <i>Reference</i>                                                                  | <i>Reference</i>                                                          | <i>Reference</i>                                              |
| N = 2199                         |                                                                                   |                                                                           |                                                               |
| 40.0-41.9 weeks                  | 0.11                                                                              | 1.62**                                                                    | 1.01                                                          |
| N = 3131                         | (-1.17 to 1.39)                                                                   | (0.54 to 2.71)                                                            | (0.82 to 1.24)                                                |
| ≥ 42.0 weeks                     | 0.64                                                                              | 3.82**                                                                    | 1.02                                                          |
| N = 438                          | (-1.76 to 3.04)                                                                   | (1.77 to 5.88)                                                            | (0.69 to 1.52)                                                |
| <i>Trend (SDS)</i>               | <i>1.60</i>                                                                       | <i>0.86</i>                                                               | <i>1.02</i>                                                   |
|                                  | <i>(1.02 to 2.17)</i>                                                             | <i>(0.36 to 1.36)</i>                                                     | <i>(0.93 to 1.13)</i>                                         |
| <i>P value</i>                   | <i>&lt; 0.001</i>                                                                 | <i>0.001</i>                                                              | <i>0.656</i>                                                  |
| <b>Birth weight</b> N = 6,482    |                                                                                   |                                                                           |                                                               |
| <2,000 grams                     | -10.85**                                                                          | -7.21**                                                                   | 0.65                                                          |
| N = 79                           | (-16.07 to -5.63)                                                                 | (-11.95 to -2.48)                                                         | (0.24 to 1.80)                                                |
| 2,000-2,499 grams                | -8.74**                                                                           | 0.39                                                                      | 0.79                                                          |
| N = 213                          | (-11.97 to -5.50)                                                                 | (-2.49 to 3.27)                                                           | (0.44 to 1.42)                                                |
| 2,500-2,999 grams                | -4.57**                                                                           | -1.98*                                                                    | 1.17                                                          |
| N = 958                          | (-6.31 to -2.83)                                                                  | (-3.51 to -0.45)                                                          | (0.89 to 1.54)                                                |
| 3,000-3,499 grams                | <i>Reference</i>                                                                  | <i>Reference</i>                                                          | <i>Reference</i>                                              |
| N = 2,241                        |                                                                                   |                                                                           |                                                               |
| 3,500-3,999 grams                | 4.14**                                                                            | 1.28*                                                                     | 0.85                                                          |
| N = 2,072                        | (2.77 to 5.55)                                                                    | (0.09 to 2.47)                                                            | (0.67 to 1.07)                                                |
| 4,000-4,499 grams                | 7.46**                                                                            | 1.81*                                                                     | 1.02                                                          |

|                    |                 |                 |                 |
|--------------------|-----------------|-----------------|-----------------|
| N = 756            | (5.55 to 9.37)  | (0.19 to 3.43)  | (0.75 to 1.40)  |
| ≥ 4,500 grams      | 11.69**         | 2.14            | 1.26            |
| N = 163            | (8.01 to 15.37) | (-1.07 to 5.34) | (0.71 to 2.23)  |
| <i>Trend (SDS)</i> | 4.64            | 1.20            | 0.98            |
|                    | (4.07 to 5.20)  | (0.71 to 1.70)  | (-0.89 to 1.08) |
| <i>P value</i>     | < 0.001         | <0.001          | 0.658           |

**Birth weight for gestational age** N = 6,482

|                            |                   |                  |                  |
|----------------------------|-------------------|------------------|------------------|
| Small for gestational age  | -9.05**           | -2.34            | 0.79             |
| N = 321                    | (-11.65 to -6.56) | (-4.69 to 0.02)  | (0.49 to 1.26)   |
| Normal for gestational age | <i>Reference</i>  | <i>Reference</i> | <i>Reference</i> |
| N = 5,779                  |                   |                  |                  |
| Large for gestational age  | 9.05              | 2.26*            | 0.95             |
| N = 321                    | (6.42 to 11.68)   | (0.05 to 4.47)   | (0.61 to 1.49)   |
| <i>Trend (SDS)</i>         | 4.52              | 0.96             | 0.93             |
|                            | (3.96 to 5.08)    | (0.47 to 1.45)   | (0.85 to 1.03)   |
| <i>P value</i>             | < 0.001           | < 0.001          | 0.934            |

Values are regression coefficients (95% Confidence Interval) based on multiple regression models and reflect the difference for each outcome for the birth weight or gestational age group, as compared to the reference group. Values for analyses on microalbuminuria are Odds ratios (95% Confidence Interval) and reflect the Odds ratio for each outcome for the birth weight or gestational age group, as compared to the reference group. Models are adjusted for sex and current age. eGFR, estimated glomerular filtration rate  
\*P<0.05 \*\*P<0.01.



**Table S4. Associations of birth outcomes with kidney outcomes at the age of 6 years with non-imputed data**

| <b>Birth characteristics</b>     | <b>Combined kidney volume (cm<sup>3</sup>)</b> | <b>eGFR (ml/min per 1.73m<sup>2</sup>)</b> | <b>Micro albuminuria (Odds Ratio)</b> |
|----------------------------------|------------------------------------------------|--------------------------------------------|---------------------------------------|
| <b>Gestational age N = 6,482</b> |                                                |                                            |                                       |
| < 34 weeks<br>N = 98             | -21.84**<br>(-34.52 to -9.16)                  | -4.82<br>(-16.70 to 7.05)                  | 1.68<br>(0.20 to 13.91)               |
| 34.0 – 35.9 weeks<br>N = 102     | -5.36<br>(-11.28 to 0.56)                      | 3.44<br>(-2.29 to 9.18)                    | 0.90<br>(0.27 to 3.00)                |
| 36.0 – 37.9 weeks<br>N = 514     | -2.52<br>(-5.50 to -0.46)                      | 1.22<br>(-1.66 to 4.10)                    | 1.06<br>(0.59 to 1.90)                |
| 38.0 - 39.9 weeks<br>N = 2199    | <i>Reference</i>                               | <i>Reference</i>                           | <i>Reference</i>                      |
| 40.0-41.9 weeks<br>N = 3131      | -1.03<br>(-2.62 to 0.56)                       | 1.12<br>(-0.41 to 2.66)                    | 1.16<br>(0.85 to 1.59)                |
| ≥ 42.0 weeks<br>N = 438          | -0.64<br>(-3.51 to 2.24)                       | 2.65<br>(-0.15 to 5.45)                    | 1.39<br>(0.83 to 2.34)                |
| <i>Trend (SDS)</i>               | <i>0.83</i><br><i>(0.03 to 1.63)</i>           | <i>0.36</i><br><i>(-0.41 to 1.13)</i>      | <i>1.03</i><br><i>(0.88 to 1.20)</i>  |
| <i>P values</i>                  | <i>0.041</i>                                   | <i>0.360</i>                               | <i>0.730</i>                          |
| <b>Birth weight N = 6,482</b>    |                                                |                                            |                                       |
| <2,000 grams<br>N = 79           | -13.20**<br>(-21.76 to -4.64)                  | -8.09<br>(-17.18 to 0.99)                  | 0.49<br>(0.07 to 3.78)                |
| 2,000-2,499 grams<br>N = 213     | -3.92<br>(-8.53 to 0.70)                       | 2.49<br>(-2.07 to 7.06)                    | 0.98<br>(0.41 to 2.36)                |
| 2,500-2,999 grams<br>N = 958     | -1.01<br>(-3.34 to 1.33)                       | -2.14<br>(-4.41 to 0.14)                   | 0.97<br>(0.63 to 1.49)                |
| 3,000-3,499 grams<br>N = 2,241   | <i>Reference</i>                               | <i>Reference</i>                           | <i>Reference</i>                      |
| 3,500-3,999 grams<br>N = 2,072   | 0.55<br>(-1.18 to 2.28)                        | 1.14<br>(-0.52 to 2.80)                    | 0.80<br>(0.58 to 1.12)                |
| 4,000-4,499 grams<br>N = 756     | 1.84<br>(-0.56 to 4.23)                        | 1.14<br>(-1.10 to 3.37)                    | 0.69<br>(0.42 to 1.12)                |

|                                                   |                       |                        |                       |
|---------------------------------------------------|-----------------------|------------------------|-----------------------|
| ≥ 4,500 grams                                     | 3.31                  | 0.68                   | 1.09                  |
| N = 163                                           | (-1.46 to 8.12)       | (-3.99 to 5.35)        | (0.45 to 2.64)        |
| <i>Trend (SDS)</i>                                | <i>1.58</i>           | <i>0.63</i>            | <i>0.94</i>           |
|                                                   | <i>(0.77 to 2.38)</i> | <i>(-0.12 to 1.39)</i> | <i>(0.81 to 1.10)</i> |
| <i>P value</i>                                    | <i>&lt;0.001</i>      | <i>0.099</i>           | <i>0.441</i>          |
| <b>Birth weight for gestational age N = 6,482</b> |                       |                        |                       |
| Small for gestational age                         | -4.60*                | -1.88                  | 0.66                  |
| N = 321                                           | (-8.12 to -1.08)      | (-5.39 to 1.63)        | (0.30 to 1.44)        |
| Normal for gestational age                        | <i>Reference</i>      | <i>Reference</i>       | <i>Reference</i>      |
| N = 5,779                                         |                       |                        |                       |
| Large for gestational age                         | 0.72                  | 2.31                   | 1.02                  |
| N = 321                                           | (-2.61 to 4.04)       | (-0.69 to 5.31)        | (0.53 to 1.93)        |
| <i>Trend (SDS)</i>                                | <i>1.26</i>           | <i>0.61</i>            | <i>0.91</i>           |
|                                                   | <i>(0.48 to 2.05)</i> | <i>(-0.11 to 1.34)</i> | <i>(0.79 to 1.06)</i> |
| <i>P value</i>                                    | <i>0.002</i>          | <i>0.097</i>           | <i>0.234</i>          |

Values are regression coefficients (95% Confidence Interval) based on multiple regression models and reflect the difference for each outcome for the birth weight or gestational age group, as compared to the reference group. Values for analyses on microalbuminuria are Odds ratios (95% Confidence Interval) and reflect the Odds ratio for each outcome for the birth weight or gestational age group, as compared to the reference group. Models are adjusted for maternal age, body mass index, parity, ethnicity, educational level, folic acid supplementation and smoking during pregnancy, and child sex, breastfeeding, current age and body surface area. eGFR, estimated glomerular filtration rate.

\*P<0.05 \*\*P<0.01.

**Table S5. Associations of birth outcomes with kidney outcomes at the age of 6 years adjusted for kidney volume**

| <b>Birth characteristics</b>     | <b>Difference (95% CI)<br/>in eGFR<br/>(ml/min per 1.73m<sup>2</sup>)</b> | <b>Risk (Odds Ratio<br/>(95%CI)) of micro<br/>albuminuria</b> |
|----------------------------------|---------------------------------------------------------------------------|---------------------------------------------------------------|
| <b>Gestational age</b> N = 6,482 |                                                                           |                                                               |
| < 34 weeks<br>N = 98             | -1.22<br>(-8.63 to 6.19)                                                  | 0.45<br>(0.06 to 3.36)                                        |
| 34.0 – 35.9 weeks<br>N = 102     | 3.72<br>(-0.79 to 8.22)                                                   | 0.81<br>(0.25 to 1.98)                                        |
| 36.0 – 37.9 weeks<br>N = 514     | 2.10<br>(-0.24 to 4.45)                                                   | 1.03<br>(0.81 to 1.32)                                        |
| 38.0 - 39.9 weeks<br>N = 2199    | <i>Reference</i>                                                          | <i>Reference</i>                                              |
| 40.0-41.9 weeks<br>N = 3131      | 1.92**<br>(0.64 to 3.20)                                                  | 0.92<br>(0.70 to 1.21)                                        |
| ≥ 42.0 weeks<br>N = 438          | 4.08**<br>(1.70 to 6.46)                                                  | 1.07<br>(0.65 to 1.77)                                        |
| <i>Trend (SDS)</i>               | <i>0.39</i><br><i>(-0.22 to 1.00)</i>                                     | <i>0.99</i><br><i>(0.87 to 1.12)</i>                          |
| <i>P value</i>                   | <i>0.205</i>                                                              | <i>0.827</i>                                                  |
| <b>Birth weight</b> N = 6,482    |                                                                           |                                                               |
| <2,000 grams<br>N = 79           | -2.50<br>(-8.42 to 3.42)                                                  | 0.76<br>(0.23 to 2.50)                                        |
| 2,000-2,499 grams<br>N = 213     | 2.13<br>(-1.22 to 5.47)                                                   | 0.87<br>(0.43 to 1.78)                                        |
| 2,500-2,999 grams<br>N = 958     | -1.61<br>(-3.72 to 0.25)                                                  | 1.06<br>(0.73 to 1.52)                                        |
| 3,000-3,499 grams<br>N = 2,241   | <i>Reference</i>                                                          | <i>Reference</i>                                              |
| 3,500-3,999 grams<br>N = 2,072   | 0.36<br>(-1.06 to 1.78)                                                   | 0.75<br>(0.55 to 1.03)                                        |
| 4,000-4,499 grams                | -0.28                                                                     | 0.71                                                          |

|                                                   |                        |                       |
|---------------------------------------------------|------------------------|-----------------------|
| N = 756                                           | (-2.23 to 1.67)        | (0.45 to 1.11)        |
| ≥ 4,500 grams                                     | -1.05                  | 1.17                  |
| N = 163                                           | (-5.04 to 2.95)        | (0.52 to 2.65)        |
| <i>Trend (SDS)</i>                                | <i>0.09</i>            | <i>0.93</i>           |
|                                                   | <i>(-0.55 to 0.72)</i> | <i>(0.82 to 1.07)</i> |
| <i>P value</i>                                    | <i>0.789</i>           | <i>0.311</i>          |
| <b>Birth weight for gestational age N = 6,482</b> |                        |                       |
| Small for gestational age                         | -0.81                  | 0.60                  |
| N = 321                                           | (-3.64 to 2.02)        | (0.30 to 1.19)        |
| Normal for gestational age                        | <i>Reference</i>       | <i>Reference</i>      |
| N = 5,779                                         |                        |                       |
| Large for gestational age                         | 0.66                   | 1.18                  |
| N = 321                                           | (-2.02 to 3.35)        | (0.66 to 2.14)        |
| <i>Trend (SDS)</i>                                | <i>-0.09</i>           | <i>0.91</i>           |
|                                                   | <i>(-0.72 to 0.53)</i> | <i>(0.79 to 1.04)</i> |
| <i>P values</i>                                   | <i>0.771</i>           | <i>0.151</i>          |

Values are regression coefficients (95% Confidence Interval) based on multiple regression models and reflect the difference for each outcome for the birth weight or gestational age group, as compared to the reference group. Values for analyses on microalbuminuria are Odds ratios (95% Confidence Interval) and reflect the Odds ratio for each outcome for the birth weight or gestational age group, as compared to the reference group. Models are adjusted for maternal age, body mass index, parity, ethnicity, educational level, folic acid supplementation and smoking during pregnancy, and child sex, breastfeeding, current age, body surface area and childhood kidney volume. eGFR, estimated glomerular filtration rate.

\*P<0.05 \*\*P<0.01.

**Table S6. Associations of fetal and length and weight with kidney volume and function at the age of 6 years: basic model**

| <b>Growth characteristics</b> | <b>Difference (95% CI)<br/>in combined kidney<br/>volume<br/>(cm<sup>3</sup>)</b> | <b>Difference (95% CI)<br/>in eGFR<br/>(ml/min per 1.73m<sup>2</sup>)</b> | <b>Risk (Odds Ratio<br/>(95%CI)) of micro<br/>albuminuria</b> |
|-------------------------------|-----------------------------------------------------------------------------------|---------------------------------------------------------------------------|---------------------------------------------------------------|
| <b>Length</b>                 |                                                                                   |                                                                           |                                                               |
| Second trimester (SDS)        | 0.84**                                                                            | -0.15                                                                     | 0.97                                                          |
| N = 5553                      | (0.23 to 1.46)                                                                    | (-0.67 to 0.37)                                                           | ((0.88 to 1.08)                                               |
| Third trimester (SDS)         | 2.35**                                                                            | 0.37                                                                      | 0.98                                                          |
| N = 5711                      | (1.73 to 2.96)                                                                    | (-0.16 to 0.89)                                                           | (0.89 to 1.08)                                                |
| Birth (SDS)                   | 2.53**                                                                            | 0.49                                                                      | 0.97                                                          |
| N = 3963                      | (1.91 to 3.15)                                                                    | (-0.06 to 1.04)                                                           | (0.87 to 1.08)                                                |
| 6 months (SDS)                | 6.48**                                                                            | 2.09**                                                                    | 1.05                                                          |
| N = 4242                      | (5.77)                                                                            | (1.45 to 2.73)                                                            | (0.93 to 1.19)                                                |
| 12 months (SDS)               | 6.98**                                                                            | 2.01**                                                                    | 1.10                                                          |
| N= 4369                       | (6.28 to 7.68)                                                                    | (1.37 to 2.66)                                                            | (0.97 to 1.24)                                                |
| 24 months (SDS)               | 7.37**                                                                            | 2.08**                                                                    | 1.08                                                          |
| N= 4066                       | (6.70 to 8.05)                                                                    | (1.46 to 2.69)                                                            | (0.96 to 1.21)                                                |
| 36 months (SDS)               | 8.47**                                                                            | 2.07**                                                                    | 1.05                                                          |
| N= 3890                       | (7.80 to 9.13)                                                                    | (1.45 to 2.69)                                                            | (0.93 to 1.18)                                                |
| 48 months (SDS)               | 8.25**                                                                            | 1.85**                                                                    | 1.08                                                          |
| N= 3446                       | (7.53 to 8.96)                                                                    | (1.19 to 2.51)                                                            | (0.96 to 1.23)                                                |
| 72 months (SDS)               | 9.40**                                                                            | 2.26**                                                                    | 1.02                                                          |
| N= 6473                       | (8.88 to 9.91)                                                                    | (1.77 to 2.74)                                                            | (0.93 to 1.12)                                                |
| <b>Weight</b>                 |                                                                                   |                                                                           |                                                               |
| Second trimester (SDS)        | 2.03**                                                                            | 0.41                                                                      | 0.91                                                          |
| N = 5523                      | (1.40 to 2.66)                                                                    | (-0.12 to 0.93)                                                           | (0.82 to 1.01)                                                |
| Third trimester (SDS)         | 3.58**                                                                            | 0.97**                                                                    | 0.97                                                          |
| N = 5692                      | (2.99 to 4.18)                                                                    | (0.47 to 1.48)                                                            | (0.88 to 1.07)                                                |
| Birth (SDS)                   | 4.52**                                                                            | 0.96**                                                                    | 0.93                                                          |
| N = 6421                      | (3.96 to 5.08)                                                                    | (0.47 to 1.45)                                                            | (0.85 to 1.03)                                                |
| 6 months (SDS)                | 6.53**                                                                            | 0.50                                                                      | 0.98                                                          |

|                 |                 |                 |                |
|-----------------|-----------------|-----------------|----------------|
| N = 4734        | (5.86 to 7.20)  | (-0.12 to 1.11) | (0.87 to 1.11) |
| 12 months (SDS) | 7.17**          | 0.71*           | 1.05           |
| N = 4376        | (6.49 to 7.84)  | (0.07 to 1.35)  | (0.93 to 1.18) |
| 24 months (SDS) | 8.63**          | 1.25**          | 0.97           |
| N = 4124        | (7.97 to 9.29)  | (0.64 to 1.87)  | (0.86 to 1.09) |
| 36 months (SDS) | 9.06**          | 1.18**          | 0.95           |
| N = 3934        | (8.41 to 9.72)  | (0.55 to 1.80)  | (0.85 to 1.07) |
| 48 months (SDS) | 9.22**          | 0.91**          | 0.93           |
| N = 3459        | (8.53 to 9.90)  | (0.25 to 1.57)  | (0.82 to 1.05) |
| 72 months (SDS) | 10.47**         | 1.02**          | 0.88           |
| N = 3473        | (9.98 to 10.95) | (0.55 to 1.50)  | (0.81 to 0.97) |

Values are regression coefficients (95% CI) based on multiple regression models and reflect the difference for each kidney volume and function outcome per change in SDS of fetal and early childhood length or weight. Values for analyses on microalbuminuria are Odds ratios (95% CI) and reflect the difference for each kidney volume and function outcome per change in SDS of fetal and early childhood length or weight. Models are adjusted for sex and current age. eGFR, estimated glomerular filtration rate. \*P<0.05 \*\*P<0.01.

**Table S7. Associations of fetal and length and weight with kidney volume and function at the age of 6 years: confounder model**

| <b>Growth characteristics</b>         | <b>Difference (95% CI)<br/>in combined kidney<br/>volume<br/>(cm<sup>3</sup>)</b> | <b>Difference (95% CI) in<br/>eGFR<br/>(ml/min per 1.73m<sup>2</sup>)</b> | <b>Risk (Odds Ratio<br/>(95%CI)) of micro<br/>albuminuria</b> |
|---------------------------------------|-----------------------------------------------------------------------------------|---------------------------------------------------------------------------|---------------------------------------------------------------|
| <b>Length</b>                         |                                                                                   |                                                                           |                                                               |
| Second trimester<br>(SDS)<br>N = 5553 | -0.42<br>(-1.14 to 0.04)                                                          | -0.30<br>(-0.86 to 0.27)                                                  | 0.98<br>(0.88 to 1.10)                                        |
| Third trimester (SDS)<br>N = 5711     | -0.39<br>(-0.98 to 0.21)                                                          | 0.11<br>(-0.45 to 0.67)                                                   | 0.94<br>(0.84 to 1.06)                                        |
| Birth (SDS)<br>N = 3963               | -0.11<br>(-0.74 to 0.53)                                                          | 0.39<br>(-0.23 to 0.99)                                                   | 0.98<br>(0.87 to 1.10)                                        |
| 6 months (SDS)<br>N = 4242            | 0.76<br>(-0.15 to 1.68)                                                           | 1.85**<br>(1.09 to 2.61)                                                  | 1.08<br>(0.90 to 1.28)                                        |
| 12 months (SDS)<br>N= 4369            | 0.23<br>(-0.72 to 1.17)                                                           | 1.73**<br>(0.99 to 2.48)                                                  | 1.25*<br>(1.05 to 1.50)                                       |
| 24 months (SDS)<br>N= 4066            | -0.42<br>(-1.43 to 0.58)                                                          | 1.83**<br>(1.13 to 2.53)                                                  | 1.30**<br>(1.09 to 1.56)                                      |
| 36 months (SDS)<br>N= 3890            | 0.71<br>(-0.47 to 1.89)                                                           | 1.88**<br>(1.16 to 2.59)                                                  | 1.37**<br>(1.10 to 1.72)                                      |
| 48 months (SDS)<br>N= 3446            | -0.91<br>(-2.20 to 0.38)                                                          | 1.79**<br>(1.08 to 2.52)                                                  | 1.27<br>(1.00 to 1.62)                                        |
| 72 months (SDS)<br>N= 6473            | -1.00<br>(-2.14 to 0.14)                                                          | 1.94**<br>(1.39 to 2.49)                                                  | 1.45**<br>(1.16 to 1.81)                                      |
| <b>Weight</b>                         |                                                                                   |                                                                           |                                                               |
| Second trimester<br>(SDS)<br>N = 5523 | 0.63*<br>(0.02 to 1.23)                                                           | 0.37<br>(-0.21 to 0.94)                                                   | 0.91<br>(0.81 to 1.02)                                        |
| Third trimester (SDS)<br>N = 5692     | 1.13**<br>(0.55 to 1.72)                                                          | 0.71*<br>(0.16 to 1.26)                                                   | 0.92<br>(0.82 to 1.03)                                        |
| Birth (SDS)<br>N = 6421               | 1.33**<br>(0.72 to 1.94)                                                          | 0.84**<br>(0.27 to 1.42)                                                  | 0.94<br>(0.83 to 1.05)                                        |

|                 |                 |                 |                |
|-----------------|-----------------|-----------------|----------------|
| 6 months (SDS)  | 1.51**          | 0.25            | 1.02           |
| N = 4734        | (0.69 to 2.32)  | (-0.48 to 0.97) | (0.88 to 1.19) |
| 12 months (SDS) | 1.19*           | 0.56            | 1.09           |
| N = 4376        | (0.28 to 2.10)  | (-0.17 to 1.29) | (0.92 to 1.30) |
| 24 months (SDS) | 1.28*           | 1.06**          | 1.01           |
| N = 4124        | (0.19 to 2.36)  | (0.37 to 1.76)  | (0.83 to 1.24) |
| 36 months (SDS) | 1.81**          | 1.02**          | 0.98           |
| N = 3934        | (0.54 to 3.09)  | (0.31 to 1.73)  | (0.78 to 1.24) |
| 48 months (SDS) | 0.95            | 0.92*           | 0.84           |
| N = 3459        | (-0.53 to 2.44) | (0.17 to 1.67)  | (0.65 to 1.09) |
| 72 months (SDS) | 2.13*           | 0.83**          | 0.72           |
| N = 3473        | (0.01 to 4.24)  | (0.29 to 1.38)  | (0.48 to 1.07) |

Values are regression coefficients (95% Confidence Interval) based on multiple regression models and reflect the difference for each kidney outcome per change in SDS of fetal and early childhood length or weight. Values for analyses on microalbuminuria are Odds ratios (95% Confidence Interval) and reflect the difference for each kidney volume and function outcome per change in SDS of fetal and early childhood length or weight. Models are adjusted for maternal age, body mass index, parity, ethnicity, educational level, smoking, total daily calorie intake and alcohol consumption during pregnancy, and gestational age, child sex, breastfeeding and current age and body surface area. eGFR, estimated glomerular filtration rate \*P<0.05 \*\*P<0.01.



**Figure S1. Association of small and large size size for gestational age with kidney volume and function at the age of 6 years**

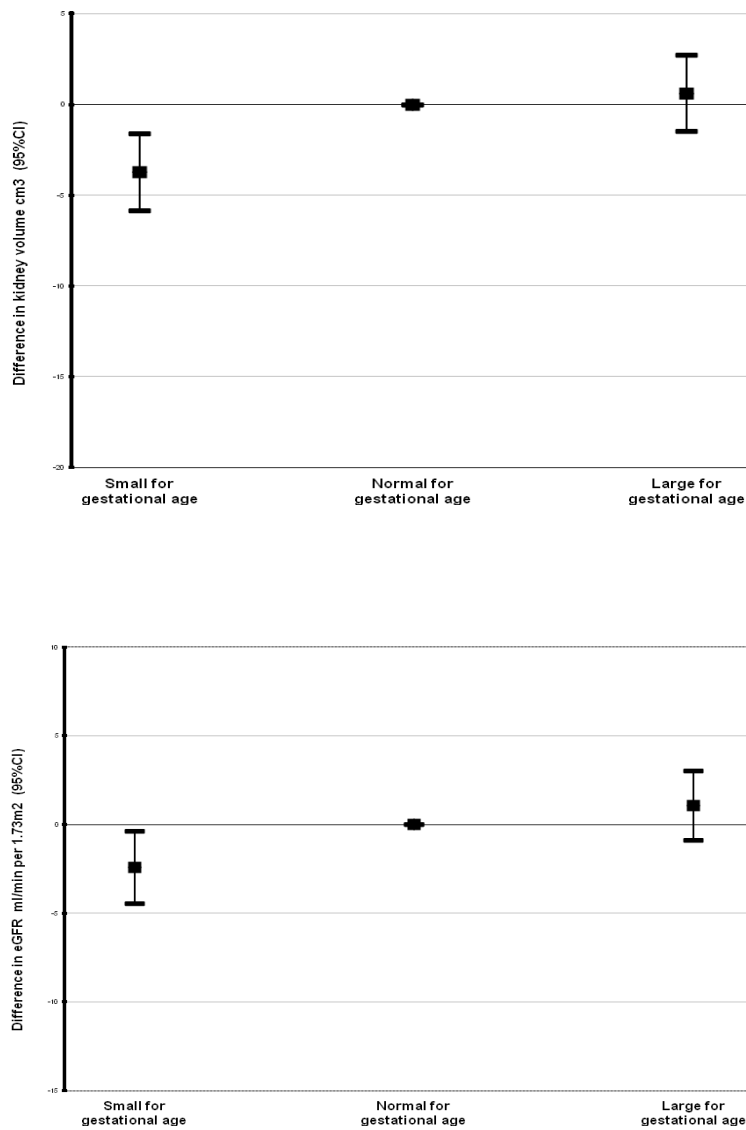

Bars represent regression coefficients (95% Confidence Interval) based on multiple regression models and reflect the difference for each kidney outcome between small (<10%), normal (10-90%) and large (>90%) size for gestational age born children. Models are adjusted for maternal age, body mass index, parity, ethnicity, educational level, folic acid supplementation and smoking during pregnancy, and child sex, breastfeeding, current age and body surface area.  $\beta$  for trend (95% Confidence Interval)

**Figure S2. Associations of fetal and childhood length with kidney outcomes at the age of 6 years**

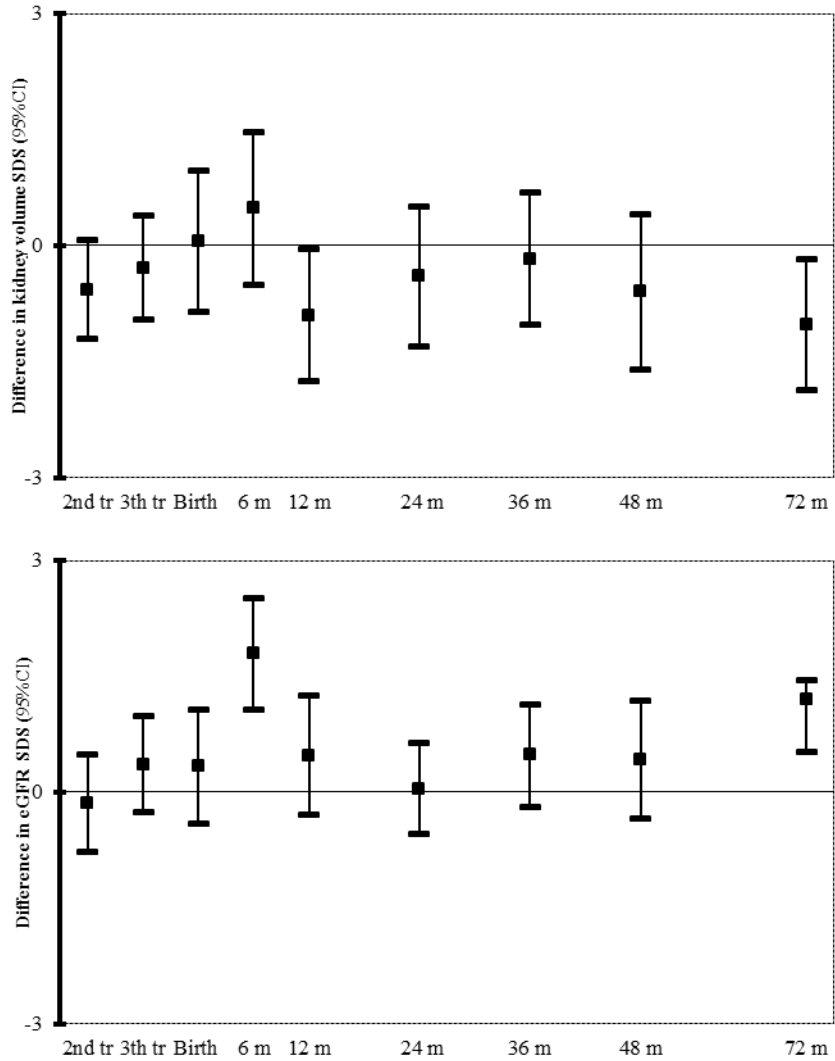

Effect estimates ((95% Confidence Interval) represent regression coefficients based on multiple regression models and reflect the difference per 1 SD increase in standardized residual score for (estimated) length measures at different time points (see details for conditional regression models in Supplementary Material). Models are adjusted for maternal age, body mass index, parity, ethnicity, educational level, folic acid supplementation and smoking during pregnancy, and child sex, breastfeeding and current age. Models focused on kidney volume were additionally adjusted for body surface area. eGFR, estimated glomerular filtration rate.

**Figure S3. Associations of fetal and childhood weight and length with estimated glomerular filtration rate at the age of 6 years adjusted for kidney volume**

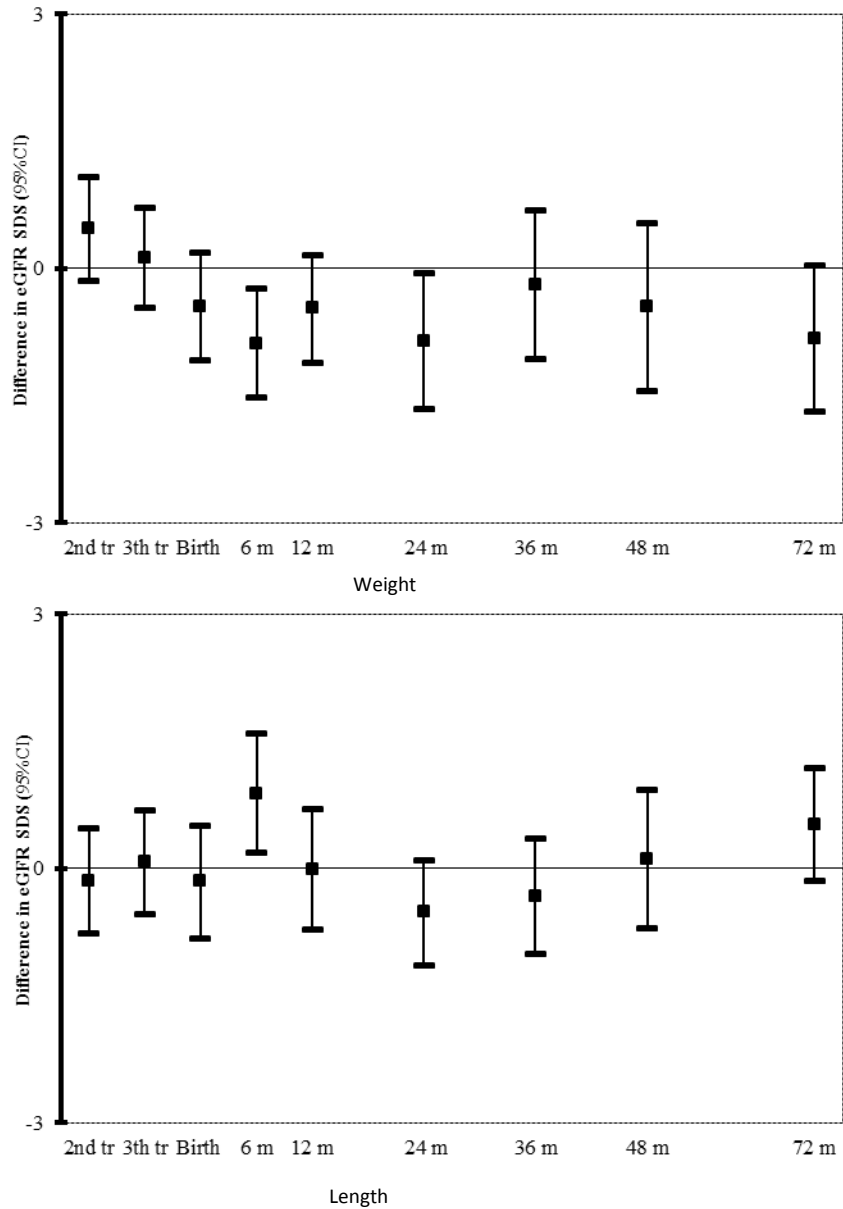

Effect estimates ((95% Confidence Interval) represent regression coefficients based on multiple regression models and reflect the difference per 1 SD increase in standardized residual score for (estimated) weight and length measures at different time points (see details for conditional regression models in Supplementary Material). Models are adjusted for maternal age, body mass index, parity, ethnicity, educational level, folic acid supplementation and smoking during pregnancy, and child sex, breastfeeding, current age and kidney volume at the age of 6 years. eGFR, estimated glomerular filtration rate.
